# Supplementary material for: Impact of antimicrobial stewardship managed by clinical pharmacists on antibiotic use and drug resistance in a Chinese hospital, 2010–2016: a retrospective observational study
Source: PubMed Central journal article supplement — BMJ Open. 2019 Aug 2;9(8):e026072. doi: 10.1136/bmjopen-2018-026072 (PMC6687004; doi:10.1136/bmjopen-2018-026072), 2019-08-02
Supplement: bmjopen-2018-026072supp001.pdf [file bmjopen-2018-026072supp001.pdf]

## Supplementary materials

**Table S1** Trend changes in incidence rate of methicillin-resistant *Staphylococcus aureus* from 2011 to 2016

|                           | By year |      |      |      |      |      | Time series analysis |         |          |
|---------------------------|---------|------|------|------|------|------|----------------------|---------|----------|
|                           | 2011    | 2012 | 2013 | 2014 | 2015 | 2016 | Trend                | $\beta$ | <i>P</i> |
| <b>Incidence rate (%)</b> | 68.0    | 60.3 | 58.3 | 49.8 | 51.5 | 37.5 | Decreasing           | -5.2565 | 0.0007   |

**Table S2** Usage trend changes of carbapenems and fluoroquinolones from 2011 to 2016

| Antibiotic          | Antibiotic consumption (DDD/100 bed-days) by year |      |       |      |      |      | Time series analysis |         |          |
|---------------------|---------------------------------------------------|------|-------|------|------|------|----------------------|---------|----------|
|                     | 2011                                              | 2012 | 2013  | 2014 | 2015 | 2016 | Trend                | $\beta$ | <i>P</i> |
| Imipenem/cilastatin | 0.59                                              | 0.71 | 0.79  | 1.17 | 1.16 | 1.36 | Increasing           | 0.1599  | 0.0013   |
| Meropenem           | 0.86                                              | 0.34 | 0.29  | 0.38 | 0.66 | 0.69 | Stable               | -0.0116 | 0.9193   |
| Levofloxacin        | 11.18                                             | 9.70 | 10.64 | 7.74 | 7.71 | 6.35 | Decreasing           | -0.9292 | 0.0033   |
| Ciprofloxacin       | 6.17                                              | 4.12 | 2.49  | 0.91 | 0.66 | 0.45 | Decreasing           | -1.1811 | 0.0461   |

DDD, defined daily dose.
